1 **Trans-biobank analysis with 676,000 individuals elucidates the**  
2 **association of polygenic risk scores of complex traits with human lifespan.**

3

4 Saori Sakaue<sup>1-3,18</sup>, Masahiro Kanai<sup>1,2,4-8,18</sup>, Juha Karjalainen<sup>4-6,8</sup>, Masato Akiyama<sup>1,9</sup>, Mitja  
5 Kurki<sup>4-6,8</sup>, Nana Matoba<sup>1</sup>, Atsushi Takahashi<sup>1,10</sup>, Makoto Hirata<sup>11</sup>, Michiaki Kubo<sup>12</sup>, Koichi  
6 Matsuda<sup>13</sup>, Yoshinori Murakami<sup>14</sup>, FinnGen, Mark J. Daly<sup>4-6,8</sup>, Yoichiro Kamatani<sup>1,15</sup>,  
7 Yukinori Okada<sup>2,16,17, \*</sup>

8

9 1. Laboratory for Statistical Analysis, RIKEN Center for Integrative Medical Sciences,  
10 Yokohama 230-0045, Japan.

11 2. Department of Statistical Genetics, Osaka University Graduate School of Medicine, Suita  
12 565-0871, Japan.

13 3. Department of Allergy and Rheumatology, Graduate School of Medicine, the University  
14 of Tokyo, Tokyo 113-8655, Japan.

15 4. Analytic and Translational Genetics Unit, Massachusetts General Hospital, Boston, MA  
16 02114, USA

17 5. Program in Medical and Population Genetics, Broad Institute of Harvard and MIT,  
18 Cambridge, MA 02142, USA

19 6. Stanley Center for Psychiatric Research, Broad Institute of Harvard and MIT, Cambridge,  
20 MA 02142, USA

21 7. Department of Biomedical Informatics, Harvard Medical School, Boston, MA 02115, USA

22 8. Institute for Molecular Medicine Finland (FIMM), University of Helsinki, Helsinki, Finland

23 9. Department of Ophthalmology, Graduate School of Medical Sciences, Kyushu University,

24 Fukuoka, Fukuoka 812-8582, Japan.

25 10. Department of Genomic Medicine, Research Institute, National Cerebral and

26 Cardiovascular Center, Suita 565-8565, Japan.

27 11. Laboratory of Genome Technology, Institute of Medical Science, the University of

28 Tokyo, Tokyo 108-8639, Japan.

29 12. RIKEN Center for Integrative Medical Sciences, Yokohama 230-0045, Japan.

30 13. Department of Computational Biology and Medical Sciences, Graduate school of

31 Frontier Sciences, the University of Tokyo, Tokyo 108-8639, Japan.

32 14. Division of Molecular Pathology, the Institute of Medical Sciences, the University of

33 Tokyo, Tokyo 108-8639, Japan.

34 15. Laboratory of Complex Trait Genomics, Department of Computational Biology and

35 Medical Sciences, Graduate School of Frontier Sciences, the University of Tokyo, Tokyo

36 108-8639, Japan.

37 16. Laboratory of Statistical Immunology, Immunology Frontier Research Center (WPI-

38 IFRc), Osaka University, Suita 565-0871, Japan.

39 17. Integrated Frontier Research for Medical Science Division, Institute for Open and

40 Transdisciplinary Research Initiatives, Osaka University, Suita 565-0871, Japan.

41 18. These authors contributed equally: S Sakaue and M Kanai.

42

43 \*Corresponding author:

44 Yukinori Okada, MD, PhD

45 Address: Department of Statistical Genetics, Osaka University Graduate School of

46 Medicine, 2-2 Yamadaoka, Suita, Osaka 565-0871, Japan.

47 Tel: +81-6-6879-3971

48 E-mail: [yokada@sg.med.osaka-u.ac.jp](mailto:yokada@sg.med.osaka-u.ac.jp)

49

50 **Abstract**

51 Human genetics seeks a way to improve human health on a global scale. Expectations are  
52 running high for polygenic risk scores (PRSs) to be translated into clinical practice to predict  
53 an inborn susceptibility to health risks. While risk stratification based on PRS is one way to  
54 promote population health, a strategy to utilize genetics to prioritize modifiable risk factors  
55 and biomarkers driving health outcome is also warranted. To this end, here we utilized PRSs  
56 to comprehensively investigate the association of the genetic susceptibility to complex traits  
57 with human lifespan in collaboration with three worldwide biobanks ( $n_{\text{total}} = 675,898$ ). First,  
58 we conducted genome-wide association studies for 45 quantitative clinical phenotypes,  
59 constructed the individual PRSs, and associated them with the age at death of 179,066  
60 participants in BioBank Japan. The PRSs revealed that the genetic susceptibility of high  
61 systolic blood pressure (sBP) was strongly associated with a shorter lifespan (hazard ratio  
62 [HR] = 1.03,  $P = 1.4 \times 10^{-7}$ ). Next, we sought to replicate these associations in individuals of  
63 European ancestry in UK Biobank ( $n = 361,194$ ) and FinnGen ( $n = 135,638$ ). Among the  
64 investigated traits, the individuals with higher blood pressure-related PRSs were trans-  
65 ethnically associated with a shorter lifespan (HR = 1.03,  $P_{\text{meta}} = 3.9 \times 10^{-13}$  for sBP) and  
66 parental lifespan (HR = 1.06,  $P_{\text{UKBB}} = 2.0 \times 10^{-86}$  for sBP). Further, our trans-biobank study  
67 identified additional complex traits associated with lifespan (e.g., obesity, height, serum lipids,  
68 and platelet counts). Of them, obesity-related traits showed strikingly heterogeneous effects  
69 on lifespan between Japanese and European populations ( $P_{\text{heterogeneity}} = 9.5 \times 10^{-8}$  for body  
70 mass index). Through trans-ethnic biobank collaboration, we elucidated the novel value of  
71 the PRS study in genetics-driven prioritization of risk factors and biomarkers which can be  
72 medically intervened to improve population health.

74 **Main**

75 **Introduction**

76 Human disease risks can be explained by the combinations and interactions of inherited  
77 genetic susceptibility, acquired environmental exposures, and lifestyle factors<sup>1</sup>. One of the  
78 goals of medical research is to identify individuals at health risks both at the time of birth and  
79 later in life, and to provide them medical attention when necessary. Polygenic risk scores  
80 (PRSs) have successfully shown their predictive ability to identify those with a several-fold  
81 higher inherited risk of a given disease or condition<sup>2</sup>. Both an increase in statistical power  
82 and ethnic diversity in genetic studies—accelerated by nation-wide biobanks—have been  
83 instrumental in accurately predicting disease onset by PRSs<sup>3–6</sup>. Stratification of health risks  
84 based on PRSs would be one of the strategies to improve population health through targeted  
85 prevention. Nevertheless, the genetic risk itself cannot be modified. For many complex  
86 human traits, environmental exposure and lifestyle are also of great importance, such as  
87 cigarette smoking<sup>7</sup> and dietary habits<sup>8</sup>. The accurate identification of risk factors that affect  
88 not only disease onset but also long-term health outcomes would contribute to population  
89 health, because these factors can be modified by medical intervention.

90 Observational studies have been attempting to identify monitorable risk factors and  
91 biomarkers that are correlated with the health outcomes (e.g., high low-density lipoprotein  
92 [LDL] cholesterol levels and the development of myocardial infarction). Nevertheless, the  
93 observational studies are inevitably laden with the pervasive issue of difficulty in inferring the  
94 cause-and-effect direction. A randomized controlled trial (RCT) is considered the gold  
95 standard to derive the effect of the exposure on the outcome free from unknown confounders<sup>9</sup>.  
96 In the above example, if a medical intervention to decrease the LDL cholesterol level leads

97 to the decreased incidence of myocardial infarction at the population level, we could estimate  
98 that the high LDL cholesterol levels cause the development of myocardial infarction. The  
99 limitations of RCTs are, however, that they require a considerable amount of human and  
100 economic resources and are not always ethically feasible.

101 To address this, we here aimed to identify complex human traits affecting human lifespan,  
102 a health outcome of extreme importance and interest, by utilizing PRSs. The association of  
103 genetic susceptibility with lifespan would enable the prioritization of common risk factors and  
104 biomarkers, which could drive mortality in the current generation, among a variety of  
105 phenotypes that could be monitored in clinics. Furthermore, integration with deep-phenotype  
106 records and follow-up data in biobanks would enable us to pinpoint specific comorbidities and  
107 death causes that lead this association. Given the large genetic and environmental  
108 differences among populations, trans-ethnic comparison is also warranted. A collaboration  
109 with three trans-ethnic nation-wide biobanks collecting genotype, phenotype and survival  
110 data ( $n_{\text{total}} = 675,898$ ) has enabled us to uncover the modifiable risk factors and monitorable  
111 biomarkers affecting human lifespan across the populations, on an unprecedented scale and  
112 without any clinical intervention.

113

## 114 **Results**

### 115 ***Study overview***

116 An overview of our study design is presented in **Supplementary Figure 1**. We collaborated  
117 with three nation-wide biobanks (BioBank Japan [BBJ], UK Biobank [UKBB], and FinnGen)  
118 to elucidate clinical biomarkers affecting the lifespan of the current generation, across the  
119 different populations. The BioBank Japan cohort consisted of 200,000 participants mainly of  
120 Japanese ancestry, with clinical phenotype, biochemical measurement, lifestyle, and  
121 genotype data. The detailed information of this cohort is described elsewhere<sup>10–12</sup> and in  
122 **Supplementary Table 1a**. Of them, 138,278 participants were followed up for their health  
123 record after an initial visit, including disease onset, survival outcome, and the cause of death  
124 if they died. The mean follow-up period was 7.44 years, and the number of deaths during the  
125 follow-up was 31,403. The UK Biobank project is a population-based prospective cohort  
126 consisting of approximately 500,000 people in the United Kingdom with deep phenotype and  
127 genotype data (summary in **Supplementary Table 1b**; see **URLs**). The biobank participants  
128 are linked to a death registry, which provides the age and cause of death when they die. In  
129 this study, we analyzed 10,483 deaths during a mean follow-up period of 6.97 years. FinnGen  
130 is a public-private partnership project combining genotype data from Finnish biobanks and  
131 digital health record data from Finnish health registries (see **URLs**). We analyzed 11,058  
132 deaths in the national death registry among the 135,638 participants in this study.

133 We first sought to identify clinical biomarkers that were associated with lifespan in BioBank  
134 Japan and UK Biobank as an illustration of a conventional observational study. We then  
135 performed an association test of the PRSs (i.e., genetic susceptibility) of these biomarkers  
136 with lifespan in BioBank Japan, in order to elucidate the drivers, not the correlation, affecting

137 human lifespan. We next performed replication studies of the association of the PRSs with  
138 lifespan in UK Biobank and FinnGen. We finally meta-analyzed these associations across  
139 the three cohorts.

140

### 141 ***Association study of clinical biomarkers with human lifespan***

142 First, in order to identify candidate clinical biomarkers correlated with human lifespan, we  
143 conducted an observational association study of these phenotypes with the lifespan on  
144 BioBank Japan. After the Bonferroni correction for multiple testing, 38 out of 45 clinical  
145 phenotypes showed a significant association with age at death (**Figure 1a**; Summary results  
146 are in **Supplementary Table 2**). The top traits associated with a shorter lifespan were low  
147 albumin, high  $\gamma$ -glutamyl transpeptidase, and increased height. The effect of a one standard  
148 deviation (SD) increase in each trait on mortality resulted in a hazard ratio (HR) of 0.80 [0.79–  
149 0.81], 1.16 [1.15–1.17], and 1.30 [1.27–1.32] ( $P = 3.3 \times 10^{-287}$ ,  $1.1 \times 10^{-224}$ , and  $8.3 \times 10^{-186}$ ),  
150 respectively. These results were consistent with the previous epidemiological studies in other  
151 cohorts<sup>13–16</sup>.

152 To investigate how the association of clinical biomarkers with human lifespan is shared  
153 across different populations, we next performed the same observational study in UK Biobank  
154 using the 20 clinical phenotypes that were recorded in both UK Biobank and in BioBank  
155 Japan (**Supplementary Figure 2**). We again observed significant associations of the  
156 quantitative traits with lifespan in 17 out of 20 traits. Of note, 14 among the 15 traits with  
157 significant association in BioBank Japan showed directionally concordant associations with  
158 lifespan in UK Biobank. The only trait that showed directionally discordant association was  
159 body mass index (BMI). While a lower BMI was significantly associated with a shorter lifespan



160 in Biobank Japan, a higher BMI showed significant association with a shorter lifespan in UK  
161 Biobank. This discordant result could be attributed to differences in the participation criteria  
162 (i.e. hospital-based recruitment in BioBank Japan and healthy volunteers in UK Biobank) and  
163 differences in the health burden of obesity across populations, which warrants further  
164 replication studies in different cohorts.

165 A weakness of the epidemiological associations was, however, that it was difficult to  
166 conclude whether the variations in clinical measurements had caused the variations in  
167 lifespan, or they were just correlations. For example, a decreased albumin level was  
168 associated with a shorter lifespan, but this did not mean that low albumin caused high  
169 mortality. Rather, the decline in general health and nutritional status, which led to high  
170 mortality, might have resulted in low albumin levels.

**a. Observed phenotype**

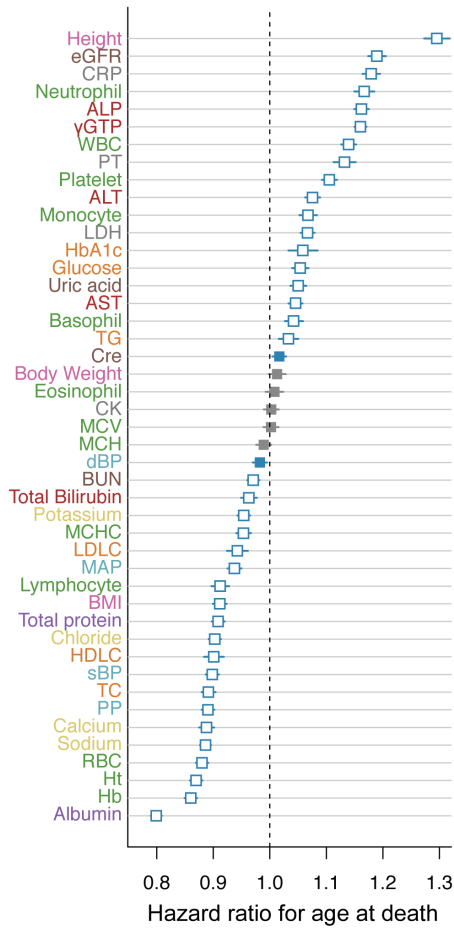

**b. Polygenic risk score**

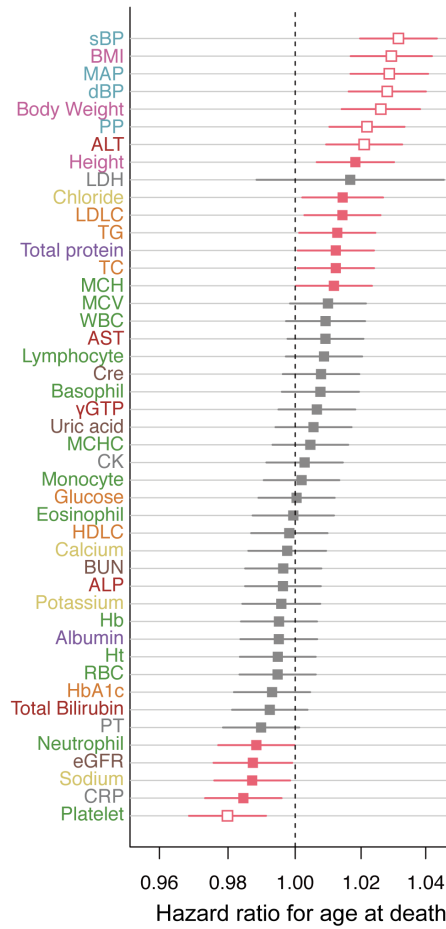

**c. Coplot of coefficients**

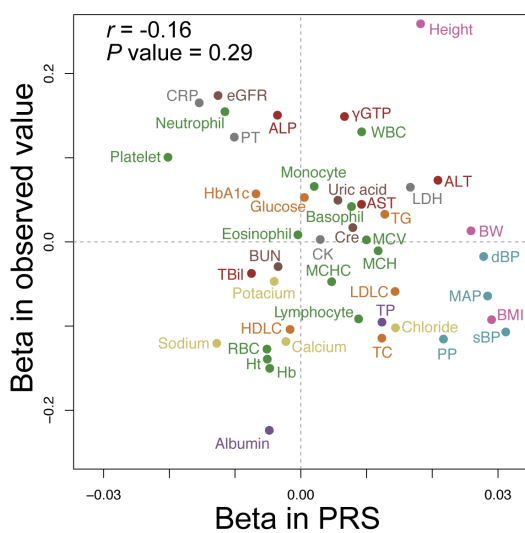

| Category                 | Trait name                                                                                                                                                                                                                                                                            |
|--------------------------|---------------------------------------------------------------------------------------------------------------------------------------------------------------------------------------------------------------------------------------------------------------------------------------|
| <i>Anthropometric</i>    | Height, Body weight (BW), Body mass index (BMI)                                                                                                                                                                                                                                       |
| <i>Blood Pressure</i>    | Systolic blood pressure (sBP), Diastolic blood pressure (dBP), Mean arterial blood pressure (MAP), Pulse pressure (PP)                                                                                                                                                                |
| <i>Protein</i>           | Total protein (TP)                                                                                                                                                                                                                                                                    |
| <i>Electrolyte</i>       | Albumin, Sodium, Potassium, Chloride, Calcium                                                                                                                                                                                                                                         |
| <i>Metabolic</i>         | Total cholesterol (TC), Triglyceride (TG), HDL cholesterol (HDL), LDL cholesterol (LDL), Glucose, HbA1c                                                                                                                                                                               |
| <i>Other biochemical</i> | Prothrombin time (PT), C-reactive protein (CRP), Lactate dehydrogenase (LDH), Creatine kinase (CK)                                                                                                                                                                                    |
| <i>Liver-related</i>     | Aspartate aminotransferase (AST), Alanine aminotransferase (ALT), Total Bilirubin (TBil), Alkaline phosphatase (ALP)                                                                                                                                                                  |
| <i>Kidney-related</i>    | γ-glutamyl transpeptidase (yGTP), Blood urea nitrogen (BUN), Creatinine (Cre)                                                                                                                                                                                                         |
| <i>Hematological</i>     | eGFR, Uric acid, Red blood cell (RBC), Hemoglobin (Hb), Hematocrit (Ht), Mean corpuscular volume (MCV), Mean corpuscular hemoglobin (MCH), Mean corpuscular hemoglobin concentration (MCHC), White blood cell (WBC), Neutrophil, Eosinophil, Basophil, Monocyte, Lymphocyte, Platelet |

171

172

173

**Figure 1. The hazard ratios for the age at death, according to clinical phenotypes and according to the PRSs and their correlations in BioBank Japan.**

174 Shown are the adjusted HRs from Cox proportional-hazard models for lifespan, according to  
175 clinical phenotypes **(a)** and according to the PRSs for the clinical phenotypes **(b)** in BioBank  
176 Japan. The boxes indicate the point estimates, and the horizontal bars indicate the 95%  
177 confidence interval. Boxes in blue **(a)** or red **(b)** indicate the nominal significance ( $P < 0.05$ ),  
178 and the white-out boxes indicate the statistical significance after correcting for multiple testing  
179 by the Bonferroni method. **(c)** Co-plot of the coefficients from the Cox proportional-hazard  
180 models for lifespan according to the PRS (x-axis) and those according to clinical phenotypes  
181 (y-axis).

182

183

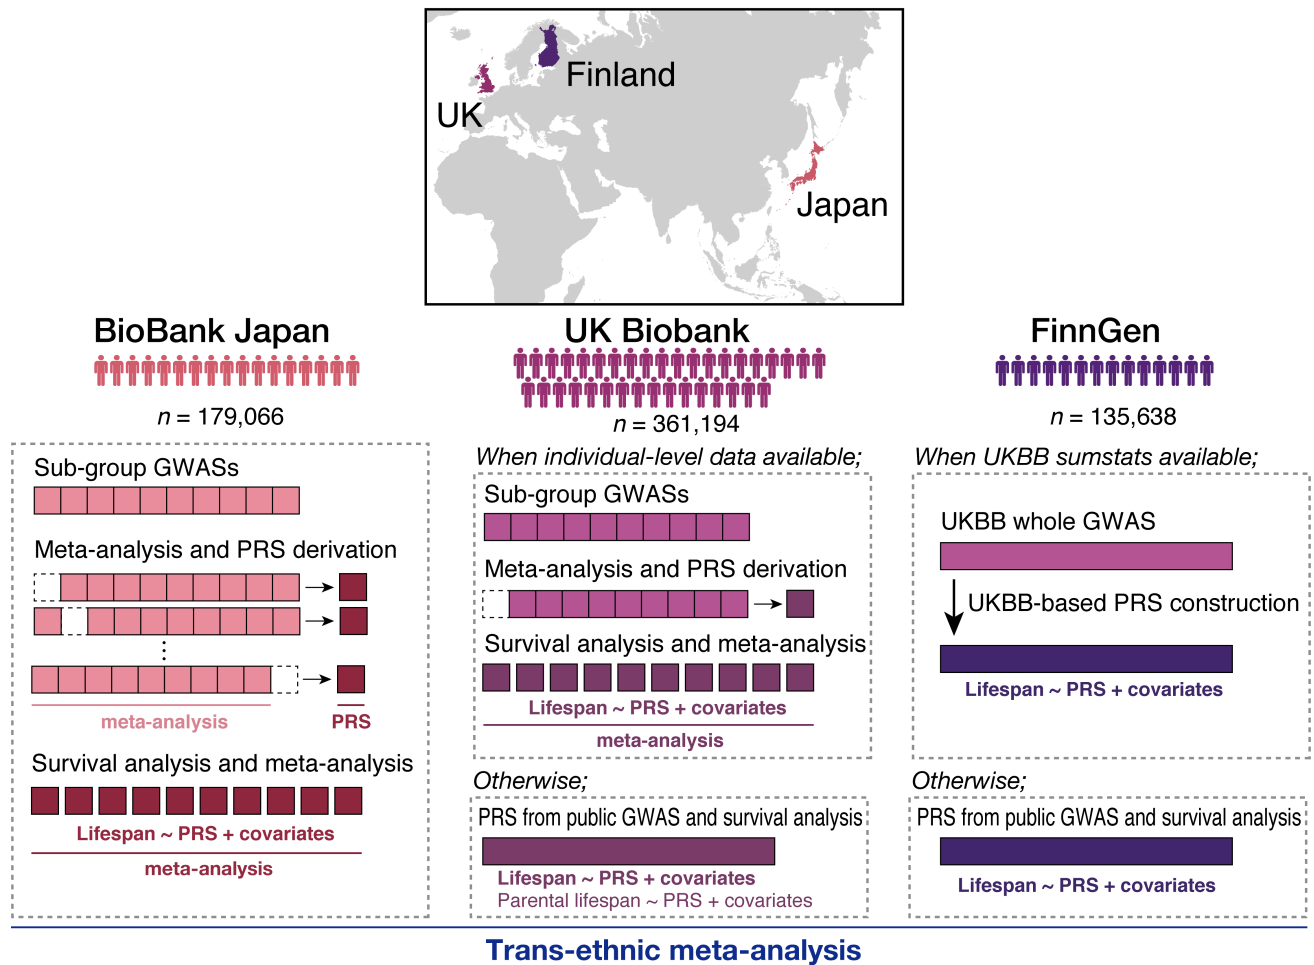

184

185 **Figure 2. Overview of PRS-lifespan association study in collaboration with three**  
 186 **nation-wide biobanks.**

187 In BioBank Japan, we first randomly split the entire cohort into 10 sub-groups and performed  
 188 genome-wide association studies (GWASs) on 45 quantitative traits. We then performed a  
 189 10-fold leave-one-group-out (LOGO) meta-analysis, derived the PRSs in one remaining sub-  
 190 group, and associated them with lifespan. We meta-analyzed the statistics of the lifespan  
 191 association obtained from the ten sub-groups. In UK Biobank, when individual-level  
 192 phenotype data is available, we adopted the LOGO approach. Otherwise, we derived the  
 193 PRSs from public large-scale GWAS statistics, and associated the PRSs with lifespan in the  
 194 cohort. As a secondary analysis, we also associated the PRS with parental lifespan in UK

195 Biobank. In FinnGen, we derived the PRSs from UK Biobank GWAS summary statistics or  
196 public large-scale GWAS statistics, and associated the PRS with lifespan in the cohort.  
197 Finally, we performed trans-ethnic meta-analysis.

198 ***Association study of PRSs of complex traits with human lifespan in BioBank Japan***

199 Next, in order to prioritize the clinical traits affecting human lifespan, we utilized genetic  
200 information. PRS is supposed to simulate the genetic predisposition towards the investigated  
201 trait<sup>1</sup>. Thus, the association of the PRS of the investigated trait with lifespan can be  
202 considered as less susceptible to the confounding factors such as a decline in general  
203 health<sup>17,18</sup>. PRSs should be constructed from the genetic studies of the same population<sup>5,19</sup>,  
204 and BioBank Japan has been the largest study of East Asian populations to date.  
205 Conventionally, when independent large-scale GWAS statistics with matched population and  
206 a sufficient sample size are not available for constructing PRSs, a strategy to split the study  
207 cohort into two groups (i.e., discovery group to conduct GWASs and a validation cohort to  
208 derive the PRSs) has been used. This strategy compromises accurate estimates in GWAS  
209 statistics using maximum samples or lowers the statistical power in PRS validations,  
210 depending on how the cohort is split. To address this, we adopted a 10-fold leave-one-group-  
211 out (LOGO) meta-analysis approach in the derivation of PRSs in order to validate the PRSs  
212 in participants independent from GWAS while retaining as much sample size and statistical  
213 power as possible. Briefly, we first conducted GWASs on 45 clinical phenotypes by randomly  
214 splitting the whole cohort into ten sub-groups (**Supplementary Table 3** shows the detailed  
215 phenotype information used in GWASs). Then, we meta-analyzed nine GWASs  
216 (**Supplementary Table 4** for the GWAS summaries), constructed PRSs from the meta-  
217 analyzed statistics by using a clumping and thresholding method, and performed survival  
218 analyses to investigate the association of the derived PRS with individual lifespan (age at  
219 death) in the one withheld sub-group. We repeated this analysis ten times and further meta-  
220 analyzed the statistics of survival analyses in the 10 sub- groups (**Figure 2** and **Methods** for

221 the study design). Thus, we were able to maintain the sample size in GWASs at nine-tenths  
222 of the whole cohort and at the same time, validate the derived PRSs using all of the  
223 individuals in the cohort.

224 Among the investigated clinical phenotypes, higher PRSs of blood pressure-related traits  
225 (systolic blood pressure [sBP], diastolic blood pressure [dBP], and mean arterial pressure  
226 [MAP]) were significantly associated with a shorter lifespan (**Figure 1b**; summary results  
227 shown in **Supplementary Table 2**). In the case of sBP, whose PRS showed the strongest  
228 association with the age at death (HR of per SD increase in PRS on mortality = 1.03 [1.02–  
229 1.04],  $P = 1.4 \times 10^{-7}$ ), individuals with the highest sBP PRS (in the top quintile) had indeed a  
230 1.46-fold higher risk of being hypertensive (sBP > 130 mmHg or dBP > 80 mmHg) or being  
231 treated with anti-hypertensive medications when compared with those with the lowest PRS  
232 (in the bottom quintile;  $P = 1.4 \times 10^{-84}$ ). A comparison between the standardized survival  
233 curves according to the observed phenotype and those according to the PRS of the  
234 phenotype is highlighted in **Figure 3**. Those with the highest PRS (in the top quintile) and  
235 thus with the genetic predisposition to cause increased blood pressure were significantly  
236 associated with an increased risk of standardized mortality than those with the lowest PRS  
237 (the standardized 10-year mortality rate was 0.210 and 0.217, respectively, **Figure 3b**, top).  
238 On the other hand, the measured blood pressure value showed U-shaped associations with  
239 lifespan, with those with the lowest and the highest sBP both harboring an increased risk of  
240 mortality (**Figure 3a** top and **Supplementary Figure 3**). By utilizing the genetic data, we  
241 disentangled the dose-dependent association of the genetic risk of high blood pressure with  
242 a short lifespan, while the observed association of the lowest-range blood pressure with a  
243 short lifespan might have been confounded by the consequence (i.e. decline in general health

244 caused low blood pressure<sup>20</sup>). This contrasts with the case of albumin. Although the  
245 measured low albumin level showed the strongest association with a short lifespan (**Figure**  
246 **3a**, bottom), the PRS of the albumin did not show any association with the age at death (HR  
247 = 0.99 [0.98–1.00],  $P = 0.40$ , **Figure 3b**, bottom). Overall, there was no significant correlation  
248 of the effect size and directions between the association of clinical phenotypes on lifespan  
249 and the association of PRSs of clinical phenotypes on lifespan ( $r = -0.16$ ,  $P = 0.29$ ; **Figure**  
250 **1c**), which was not confounded by the variance explained by PRSs in each trait (shown in  
251 **Supplementary Table 5**). To summarize, the PRSs have provided novel and distinct insights  
252 into prioritizing critical factors affecting human lifespan from the observational studies.

253 In addition to the overall survival outcome, we also tested the cause-specific mortality that  
254 drives the association with the sBP PRS, by leveraging the detailed follow-up data in BioBank  
255 Japan. Among the four most frequent causes of death in Japan<sup>11</sup>, a high sBP PRS was  
256 significantly associated with death from cardiovascular diseases (I01–I02, I05–I09, I20–I25,  
257 I27 and I30–I52 [HR = 1.04 (1.01–1.08),  $P = 0.0064$ ]) and nominally associated with death  
258 from cerebrovascular diseases (I60–69 [HR = 1.05 (1.01–1.10),  $P = 0.024$ ]), as categorized  
259 by the International Classification of Diseases 10. We next performed comorbidity-stratified  
260 analysis in the association of sBP PRS with lifespan. We found that individuals with a past  
261 medical history of type 2 diabetes, cerebral infarction, or dyslipidemia strongly drove the  
262 association of sBP PRS with lifespan in Japanese individuals (HR = 1.05 [1.03–1.07], 1.06  
263 [1.03–1.09], 1.05 [1.02–1.08], and  $P = 2.6 \times 10^{-5}$ ,  $1.9 \times 10^{-4}$ ,  $4.0 \times 10^{-3}$ , respectively). These  
264 results recapitulated the epidemiological knowledge that high blood pressure is one of the  
265 strongest risk factors of mortality among patients with cardiovascular<sup>21</sup>, cerebrovascular<sup>22,23</sup>,



266 and metabolic diseases<sup>24</sup>. It has been previously reported that healthy-aging individuals had  
267 low genetic risk of coronary artery disease<sup>25</sup>, which is in line with our findings.  
268

**a. Observed phenotype**  
Systolic blood pressure

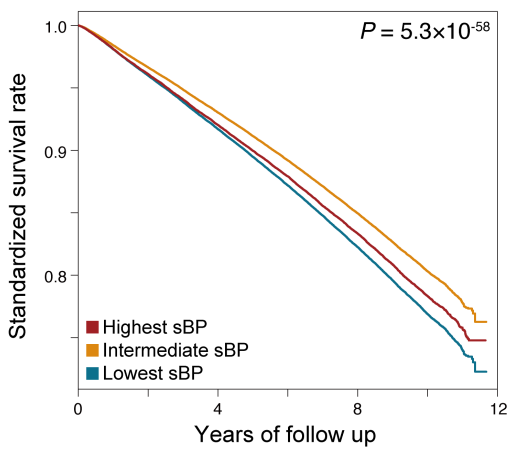

**b. Polygenic risk score**  
Systolic blood pressure

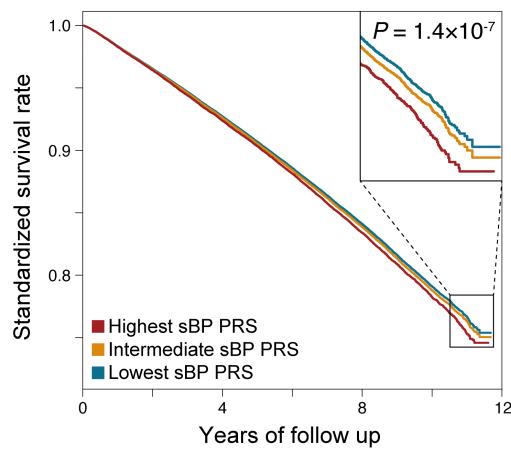

Albumin

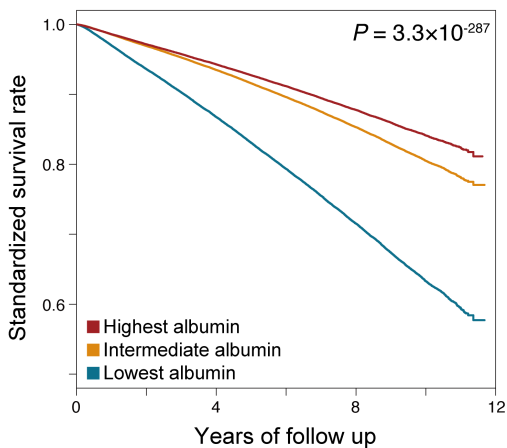

Albumin

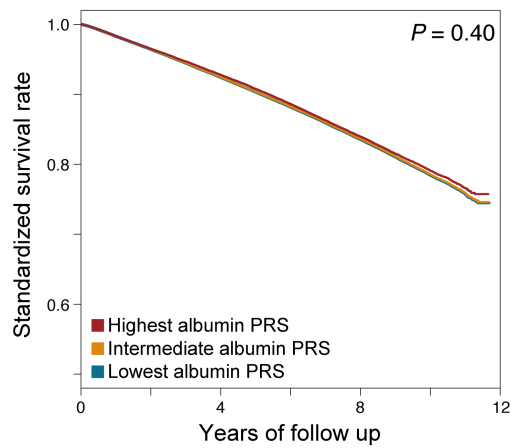

269

270 **Figure 3. Standardized survival rate, according to systolic blood pressure (sBP) and**  
271 **albumin, and PRS status of both traits in BioBank Japan.**

272 In each box, the standardized and adjusted survival curves according to three bins (lowest,  
273 first quintile; intermediate, 2–4 quintiles; and highest, fifth quintile) of the investigated trait or  
274 the PRS of the investigated trait are illustrated by analyzing mortality data in BioBank Japan.

275 The standardization was performed using the mean of all the covariates. **(a)** Survival curves  
276 according to measured sBP value (top) and according to sBP PRS (bottom). **(b)** Survival  
277 curves according to measured serum albumin level (top) and according to albumin PRS.

278

279 ***Trans-ethnic association study of PRSs of complex traits with human lifespan***

280 Next, we sought to replicate these associations in individuals of European ancestry using the  
281 individual-level data of UK Biobank ( $n = 361,194$ ) and FinnGen ( $n = 135,638$ ). We first  
282 constructed the PRSs by adopting the 10-fold LOGO meta-analysis approach when the  
283 individual-level phenotype was available (20 out of 33 traits in UK Biobank). Otherwise, we  
284 derived the PRSs by using independent publicly available large-scale GWAS summary  
285 statistics of European ancestry (13 out of 33 traits in UK Biobank and all the 33 traits in  
286 FinnGen) with a linkage disequilibrium (LD) reference of European individuals (**Figure 2** and  
287 **Methods** for the study design and **Supplementary Table 6** for public GWAS information). In  
288 this way, we could calculate the individual PRSs of 33 quantitative traits among the 45  
289 investigated traits in BioBank Japan (**Supplementary Table 7** and **8** for phenotype and  
290 internal GWAS summary). We then associated the derived PRSs with lifespan in UK Biobank  
291 and FinnGen, and finally performed a trans-ethnic meta-analysis across the three cohorts  
292 (Summary results are shown in **Supplementary Table 9**). In UK Biobank and FinnGen, we  
293 successfully replicated the directional consistency of the association of a genetically  
294 increased risk of sBP with a shorter lifespan (HR = 1.02 [1.00–1.04],  $P = 0.083$  in UK Biobank  
295 [**Figure 4b**] and HR = 1.03 [1.01–1.05],  $P = 0.0031$  in FinnGen [**Figure 4c**]). A fixed-effect  
296 meta-analysis revealed a trans-ethnically robust association of higher PRSs of sBP with a  
297 shorter lifespan (HR = 1.03 [1.02–1.04],  $P = 3.9 \times 10^{-13}$ ; **Figure 4d**). To further validate this  
298 finding, we also performed a secondary analysis using parental lifespan data in UK Biobank,  
299 which offered a much larger statistical power (see **Methods** for the detailed analysis method).  
300 The secondary analysis revealed that a genetically increased risk of sBP was also associated  
301 with a shorter parental lifespan (HR = 1.06 [1.06–1.07],  $P = 2.0 \times 10^{-86}$ ).

302 Interestingly, the high PRSs of BMI and body weight (BW) were most significantly  
303 associated with short lifespan in UK Biobank and FinnGen (BMI: HR = 1.07 [1.05-1.09] and  
304 1.06 [1.04-1.08],  $P = 1.7 \times 10^{-11}$  and  $1.5 \times 10^{-8}$ , respectively), while they showed much smaller  
305 effect sizes and less significant associations in BioBank Japan (BMI: HR = 1.01 [1.00-1.02],  
306  $P = 0.094$ ). We noted that a strong effect of obesity on lifespan was consistent between the  
307 two of the European cohorts, UK Biobank and FinnGen, which would suggest the robustness  
308 of the result against the methods used for the calculation of PRSs (i.e., LOGO in UK Biobank  
309 and usage of independent GWAS summary statistics in FinnGen). Among all the investigated  
310 traits, the random effect meta-analyses only revealed a significant heterogeneity in  
311 association for BMI and BW ( $P_{\text{heterogeneity}} = 9.5 \times 10^{-8}$  [BMI] and  $1.5 \times 10^{-8}$  [BW]). We did not  
312 observe apparent differences in the heritability and variance explained by the PRSs of BMI  
313 or BW between in BioBank Japan and UK Biobank (**Supplementary Table 4, 5, 8 and 10**).  
314 Thus, we considered that the reasons for this trans-ethnic heterogeneity was not attributed  
315 to the differences in GWASs utilized for the derivations of PRSs. The observed trait mean  
316 and SD were larger in the European cohorts before normalization (the mean for BMI was  
317 23.3, 27.4, and 27.2, and the SD was 3.7, 4.8, and 4.1 in BioBank Japan, UK Biobank and  
318 FinnGen, respectively), and this was also the case in World Health Organization (WHO) data  
319 from 2016 (BMI: 22.8 [22.5–23.2] in Japan, 27.5 [27.2–27.8] in UK, and 26.6 [26.1–27.1] in  
320 Finland; see **URLs**). Obesity-related cardiovascular deaths are significantly prevalent among  
321 Europeans, and the epidemiological data revealed that the mortality rate of individuals in the  
322 in high BMI range was higher in Europeans than in East Asians<sup>26</sup>. The heterogeneity in the  
323 association of BMI or BW PRSs on lifespan between Japanese and Europeans might reflect  
324 the differences in the strength of the effect of obesity on mortality, on which further trans-

325 ethnic studies should be warranted.

326 To determine what is driving the association of BMI PRS on lifespan (i.e. mortality) in  
327 Europeans, we additionally investigated the cause-specific mortality and comorbidity  
328 information recorded in UK Biobank. When we tested the association of BMI PRS with the  
329 cause-specific mortality in UK Biobank, the BMI PRS was most strongly associated with  
330 cerebrovascular death (HR = 1.12 [1.08–1.17],  $P = 3.1 \times 10^{-8}$ ). When we stratified individuals  
331 based on the comorbid conditions (i.e., common disease affection status), we found that the  
332 association of BMI PRS with lifespan was strongest among those with unstable angina (HR  
333 = 1.17 [1.05–1.30],  $P = 3.1 \times 10^{-3}$ ). These analyses successfully pinpointed the target  
334 individuals who would be expected to benefit most from the modification of obesity.

335 There were several additional traits where the PRSs showed significant associations with  
336 lifespan in trans-ethnic meta-analysis after the Bonferroni correction for multiple testing ( $P_{\text{meta}}$   
337  $< 1.5 \times 10^{-3}$ ; i.e., lipid-related traits, height, and platelet count). The genetic burden of increased  
338 lipid-related traits (i.e. total cholesterol and LDL cholesterol) was associated with a shorter  
339 lifespan, which was concordant with the observational studies reporting the causal roles of  
340 cholesterol in worse health outcomes<sup>27</sup>. Height has been indicated as a risk factor for various  
341 cancers and linked with cancer-related mortality in both Europeans and Asians<sup>15,16</sup>. A lower  
342 platelet count was also reported as associated with an increased mortality in Europeans<sup>28</sup>.

343 To test whether there existed differences in the effect sizes of PRS on lifespan between  
344 males and females, we performed a sex-stratified association study of PRSs with lifespan  
345 across the investigated traits and across the three cohorts. While we did not find any  
346 significant differences between sexes within each of the three cohorts (**Supplementary**  
347 **Figure 4a–c**), the sex-stratified trans-ethnic meta-analysis revealed that the effect of high

348 dBP PRS on a short lifespan, which was the largest among 33 traits in primary meta-analysis,  
349 was significantly larger in males than in females ( $HR_{\text{male}} = 1.05$  [1.04-1.06],  $HR_{\text{female}} = 1.02$   
350 [1.00-1.03],  $P_{\text{heterogeneity}} = 0.0013$ ; **Supplementary Figure 4d**). This observation was in line  
351 with previous epidemiological studies showing that the excess mortality caused by  
352 hypertension was higher for men than for women in the Japanese population<sup>29</sup>, and that  
353 women with hypertension not complicated by left ventricular hypertrophy had lower risk of  
354 clinical major cardiovascular events than men in Europeans<sup>30</sup>.

355 Finally, in order to validate our findings, we conducted a trans-ethnic Mendelian  
356 randomization (MR) study of the 33 traits on which we had performed the trans-ethnic PRS-  
357 lifespan association study (see **Methods**). Two-sample MR with the inverse-variance  
358 weighted method revealed the following; (i) the significant causal effect of sBP and mean  
359 arterial blood pressure (MAP) on lifespan in BioBank Japan; (ii) the significant causal effect  
360 of BMI and BW on lifespan in UK Biobank and FinnGen; and (iii) that trans-ethnic meta-  
361 analysis further strengthened their significance (i.e. BMI, BW, sBP, and MAP;  $\beta_{\text{causal}} = 0.17,$   
362  $0.17, 0.15, 0.15$ ; and  $P_{\text{meta}} = 1.6 \times 10^{-11}, 9.6 \times 10^{-11}, 1.6 \times 10^{-4}, 8.2 \times 10^{-4}$  respectively; summary  
363 results shown in **Supplementary Figure 5**). While both methods (PRS and MR study) have  
364 their own limitations, such as pleiotropy and assumptions on instrumental variables<sup>31,32</sup>, we  
365 consider that the consistent result from these two methods would complement each other  
366 and further support the robustness of our findings in identifying the driver biomarkers of  
367 human lifespan.

368 To summarize, these results collectively suggest the utility of PRSs in genetics-driven  
369 identification of both known and novel drivers for longevity, and could potentially pinpoint a  
370 group of individuals who could most likely benefit from the intervention.

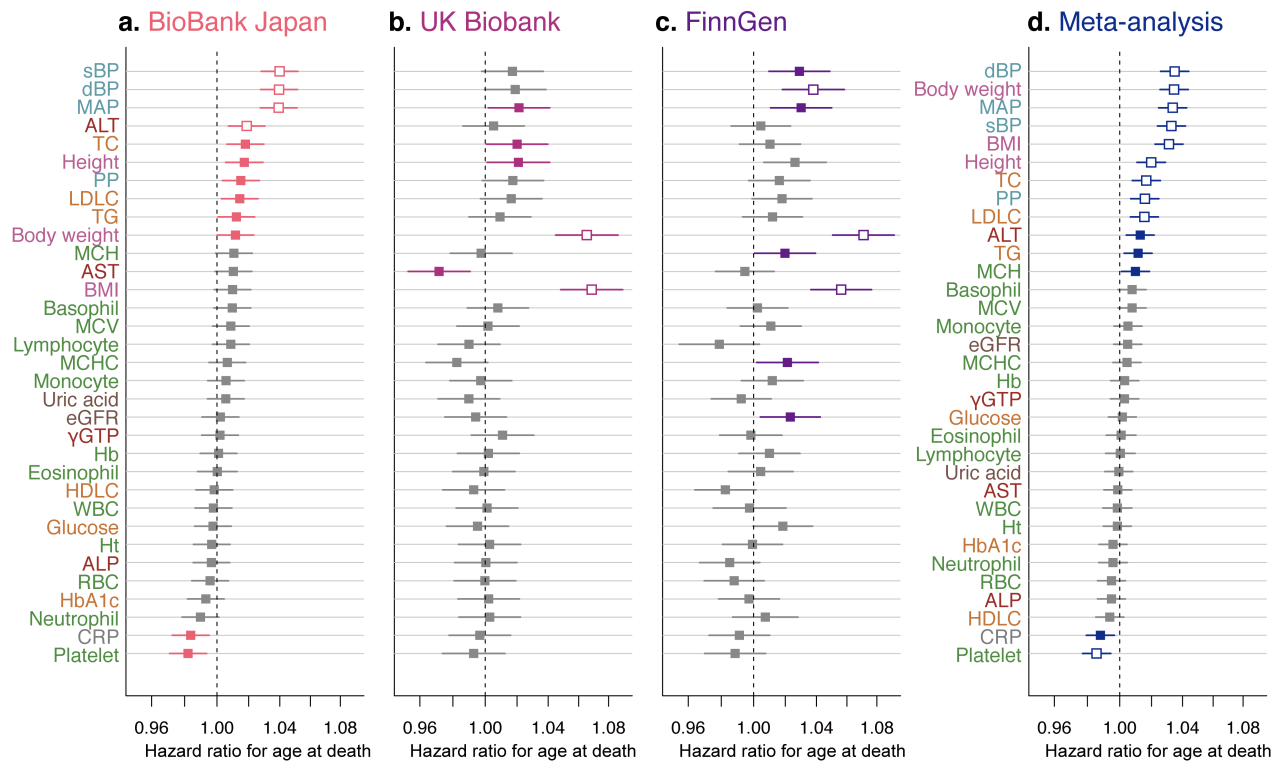

| Category              | Trait name                         | Category                 | Trait name                       | Category             | Trait name                                       |
|-----------------------|------------------------------------|--------------------------|----------------------------------|----------------------|--------------------------------------------------|
| <i>Anthropometric</i> | Height                             | <i>Metabolic</i>         | Total cholesterol (TC)           | <i>Hematological</i> | Red blood cell (RBC)                             |
|                       | Body weight (BW)                   |                          | Triglyceride (TG)                |                      | Hemoglobin (Hb)                                  |
|                       | Body mass index (BMI)              |                          | HDL cholesterol (HDLC)           |                      | Hematocrit (Ht)                                  |
| <i>Blood Pressure</i> | Systolic blood pressure (sBP)      |                          | LDL cholesterol (LDLC)           |                      | Mean corpuscular volume (MCV)                    |
|                       | Diastolic blood pressure (dBP)     |                          | Glucose                          |                      | Mean corpuscular hemoglobin (MCH)                |
|                       | Mean arterial blood pressure (MAP) |                          | HbA1c                            |                      | Mean corpuscular hemoglobin concentration (MCHC) |
|                       | Pulse pressure (PP)                | <i>Other biochemical</i> | C-reactive protein (CRP)         |                      | White blood cell (WBC)                           |
| <i>Kidney-related</i> | eGFR                               | <i>Liver-related</i>     | Aspartate aminotransferase (AST) |                      | Neutrophil                                       |
|                       | Uric acid                          |                          | Alanine aminotransferase (ALT)   |                      | Eosinophil                                       |
|                       |                                    |                          | Alkaline phosphatase (ALP)       |                      | Basophil                                         |
|                       |                                    |                          | γ-glutamyl transpeptidase (γGTP) |                      | Monocyte                                         |
|                       |                                    |                          |                                  |                      | Lymphocyte                                       |
|                       |                                    |                          |                                  |                      | Platelet                                         |

371

372 **Figure 4. Trans-ethnic association study of PRS with lifespan.**

373 Shown are the adjusted HRs from Cox proportional-hazard models for lifespan, according to

374 the PRS of the clinical phenotypes in **(a)** BioBank Japan, **(b)** UK Biobank and **(c)** FinnGen.

375 The threshold of significance for the derivation of PRS was set  $P = 1.0 \times 10^{-6}$ . We further

376 performed a trans-ethnic fixed-effect meta-analysis of the association results from the three

377 cohorts **(d)** by the inverse-variance method. The boxes indicate the point estimates, and the

378 horizontal bars indicate the 95% confidence interval. Boxes in colors indicate the nominal

379 significance ( $P < 0.05$ ) and the white-out boxes indicate the statistical significance after the

380 Bonferroni correction for multiple testing ( $P < 1.5 \times 10^{-3}$ ).

381 ***No evidence of an interaction effect of PRSs of complex traits and lifestyle factors on***  
382 ***lifespan***

383 Motivated by the identification of biomarkers genetically affecting lifespan, we finally  
384 investigated whether there existed any interaction between the PRS of these biomarkers and  
385 various lifestyles. As blood pressure PRSs were most strongly associated with lifespan in the  
386 Japanese population, we tested the interaction effect between sBP PRS and lifestyle on  
387 lifespan in BioBank Japan (**Supplementary Table 11**). While various lifestyle factors had a  
388 strong impact on lifespan (**Supplementary Table 12**), none of them showed significantly  
389 heterogeneous effects on survival according to the sBP PRS status. For example, the  
390 beneficial effect of smoking cessation on survival was not significantly different among those  
391 with the highest risk of increased blood pressure ( $\Delta$ 10-year mortality = -0.050) or those with  
392 the lowest risk of increased blood pressure ( $\Delta$ 10-year mortality = -0.049, interaction  $P = 0.63$ )  
393 in BioBank Japan. In Europeans, as we found the strongest association between the obesity  
394 PRS and lifespan, we investigated the interaction between BMI PRS and lifestyle in UK  
395 Biobank. Again, no significant interaction effect on lifespan was observed ( $P_{\text{interaction}} > 0.05$ ).

396 Taken together, even people with the high genetic burden of increased blood pressure or  
397 obesity could benefit from the modifiable lifestyles such as abstinence from smoking and  
398 regular exercise, which could lead to a better survival.

399



## 400 **Discussion**

401 Harnessing a global effort to expand genetic studies in both sample size and the scope of  
402 phenotypes, with the additional notion of the importance of population diversity<sup>5</sup>, PRS is  
403 expected to identify individuals with inborn health risks in clinics. While early detection and  
404 appropriate health communication should contribute to the improvement of health care<sup>33</sup>, the  
405 inherited genetic risks of disease onset cannot be modified.

406 We here showed the novel value of PRS study to identify the monitorable phenotypes that  
407 genetically affect health outcomes. Our approach has the potential to contribute to the  
408 improvement of healthcare because the identified factors can be modified by medical  
409 intervention. We showed a global burden of increased blood pressure and obesity as drivers  
410 of mortality from genetics. Our study also revealed that those with a genetic burden to cause  
411 high blood pressure or obesity could benefit from healthy lifestyles to the same degree as  
412 those without. If those with high-risk alleles are to be notified about their own risks, the early  
413 lifestyle modification and medical attention should prevent their premature death. Of note,  
414 the magnitude of the effect size in which the PRS of the trait was associated with lifespan  
415 was relatively small. However, the magnitude of effect size in which the trait itself (e.g., blood  
416 pressure or obesity) affects lifespan, or in which the modification of the trait (e.g., proper  
417 blood pressure management or healthy diet) would improve health outcomes, would be  
418 expected to be larger in terms of population health.

419 In order to improve population health, we need to decide on how to prioritize the  
420 numerous health issues. The observational studies could partly address this point, but the  
421 biggest challenge has been that we cannot infer the cause-and-effect direction. While RCTs  
422 have been the gold standard to provide robust evidence of the effect of risk factors on health

423 outcomes, they are not always feasible because conducting RCTs (i.e. recruitment, random  
424 allocation, treatment, and follow-up etc.) takes a huge amount of resources, which hampers  
425 the application to diverse phenotypes. Our approach, which leverages genetic and  
426 phenotypic information already existing in biobanks, would have the potential to support the  
427 clinical evidence, or to identify candidate risk factors to bring into RCTs. We also note that  
428 in-depth analyses, such as those leveraging cause-specific mortality and comorbidity data,  
429 could pinpoint target individuals who could most likely benefit from medical attention and  
430 intervention. These insights would also be useful in designing efficient RCTs or providing  
431 individualized medical evidence.

432 Notably, the genetics-driven identification of critical factors for health outcomes was made  
433 possible by trans-ethnic, large-scale, and deep-phenotyped biobanks. The trans-biobank  
434 collaboration provided (i) a large sample size, which was critical in analyzing mortality data,  
435 (ii) the opportunity for replication, which made our findings robust to cohort-specific  
436 confounders, (iii) a trans-ethnic comparison as in the example of obesity, (iv) the validation  
437 of our methodology (i.e., we confirmed the coherent result between LOGO and independent  
438 GWAS), and (v) the integration of cohort-specific data, such as parental lifespan data in UK  
439 Biobank. Nation-wide biobanks, such as those in this study, are prospectively collecting  
440 deep phenotype and health outcomes of genotyped individuals, and our proof-of-concept  
441 approach would be expected to discover the actionable traits driving health outcomes on a  
442 global scale if further applied to diverse and larger populations.

443 This study has potential limitations. First, as BioBank Japan is a hospital-based cohort, it  
444 does not represent the Japanese population as a whole. However, since we performed the  
445 survival analyses with an adjustment for the disease status and principal components

446 followed by sensitivity analyses, our main result was not confounded by the proportion of  
447 patients with a specific disease group (**Supplementary Figure 6**) or population stratification.  
448 Of note, UK Biobank generally enrolls healthy-volunteers<sup>34</sup>. The directional concordance of  
449 statistics in BioBank Japan with those in UK Biobank should further support the robustness  
450 of the results and mitigates the concern on potential biases due to the differences in genetic  
451 structure and environmental interactions. Second, it is unclear whether the PRSs of the traits  
452 that showed less significant results in our study were not associated with lifespan because  
453 there is truly no relationship, because the PRS did not sufficiently explain the variance of the  
454 investigated phenotype, or because there was a strong effect of rare variants, which were  
455 not captured in our study. Third, the polygenic effect of the variants constituting the PRSs  
456 which also partially affect other traits (pleiotropy), might have coexisted with the association  
457 of the PRS of a specific trait with lifespan. Further integration with novel statistical methods  
458 to handle and disentangle pleiotropy and desirably RCTs, if feasible, are warranted to obtain  
459 clearer insights into the true effect of the complex trait on human lifespan. Fourth, there is  
460 currently no consensus on how to optimize and harmonize the  $P$  value threshold in calculating  
461 PRSs across different cohorts. Our strategy was to set a fixed  $P$  value threshold of  $1 \times 10^{-6}$  in  
462 the trans-ethnic meta-analysis, because we could not obtain trait-specific best  $P$  values for  
463 every trait which should be optimized to maximize the variance explained by using individual-  
464 level phenotype data. We confirmed that association statistics (i.e. coefficients) from the fixed  
465 threshold of  $1 \times 10^{-6}$  was fairly concordant with those from best  $P$  values (Pearson's  $r = 0.85$   
466 and  $P = 2.5 \times 10^{-13}$  in BioBank Japan, and  $r = 0.93$  and  $P = 1.3 \times 10^{-9}$  in UK Biobank).  
467 Nevertheless, we consider that further implementation of the methodology for optimally  
468 harmonizing PRSs across different cohorts is still warranted. Fifth, it is possible that spouse-

469 pairs in biobanks might have caused a subtle bias the GWAS and PRSs-lifespan association  
470 if assortative mating exists<sup>35</sup>. Sixth, although we exhaustively checked the cohort-level  
471 overlap across biobanks and previous GWASs used in this study, we could not completely  
472 exclude the possibility of individual-level overlap, which would be technically difficult to detect  
473 as a general point in large-scale genetic studies. Last, the statistical power in the association  
474 study with lifespan was limited, partly due to a relatively short follow-up period. This was  
475 particularly the case in UK Biobank, which is a recently launched population-based cohort,  
476 and only a small number of people have died during the follow-up period. We complemented  
477 this point by utilizing parental lifespan data in UK Biobank as a secondary analysis. Since the  
478 participants of the biobanks in this study are ongoingly followed-up, the larger number of  
479 mortality records in the future would provide us with an opportunity to further validate the  
480 robustness of our results.

481 In conclusion, through trans-ethnic biobank collaboration, we demonstrated that blood  
482 pressure and obesity were genetically associated with the lifespan of the current generation  
483 on a global scale. A comparison across different populations and the integration with deep  
484 phenotype data further pinpointed a group of individuals who would be expected to benefit  
485 most from the intervention of these traits. With global biobanks' ongoing efforts—enrolling  
486 individuals from diverse background and collecting granular phenotype along with health  
487 outcomes—we have shown a potential application of genetics to improve population health  
488 by providing information of common and modifiable risk factors driving our health outcomes.  
489

490 **Acknowledgments**

491 We sincerely thank all the participants of BioBank Japan, UK Biobank, and FinnGen. We  
492 thank Dr. Aarno Palotie for his kind support for the data analysis of FinnGen, Drs. Benjamin  
493 M. Neale and Nikolas Bawa for sharing and discussing their idea on LOGO, and Dr. Alicia R.  
494 Martin for the PRS analysis on UK Biobank.

495

496 **Author Contributions**

497 S.S., Y.K., and Y.O. conceived the study. M.H., M. Kubo, K.M., Y.M. collected and  
498 managed the BioBank Japan samples. S.S., M. Kanai, M.A., N.M., A.T., M. Kubo., Y.K. and  
499 Y.O. performed data cleaning and statistical analysis on Biobank Japan. M. Kanai  
500 performed statistical analysis on UK Biobank. J.K., M. Kurki and M. Kanai performed data  
501 cleaning and statistical analysis on FinnGen. M. J. D. contributed to the overall study design  
502 and the FinnGen analysis. Y.O. supervised the study. S.S., M. Kanai, J.K., Y.K., and Y.O  
503 wrote the manuscript.

504

505 **Competing Financial Interests**

506 The authors declare that no conflicts of interest exist.

507

508

509 **Methods**

510 ***Study Populations, genotyping and imputation***

511 *BioBank Japan*

512 Clinical information and genotype data were obtained from BioBank Japan (BBJ) project<sup>10,12</sup>,  
513 which is a prospective biobank that collaboratively collected DNA and serum samples from  
514 12 medical institutions in Japan and recruited approximately 200,000 participants, mainly of  
515 Japanese ancestry, with the diagnosis of at least one of 47 diseases. All the participants  
516 provided written informed consent approved from ethics committees of RIKEN Center for  
517 Integrative Medical Sciences, and the Institute of Medical Sciences, the University of Tokyo.  
518 Detailed participant information is summarized in **Supplementary Table 1a**.

519 We genotyped participants with the Illumina HumanOmniExpressExome BeadChip or a  
520 combination of the Illumina HumanOmniExpress and HumanExome BeadChips. The quality  
521 control (QC) of participants and genotypes was described elsewhere<sup>36</sup>. In this project, we  
522 analyzed 179,066 participants of Japanese ancestry as determined by the principal  
523 component analysis (PCA)-based sample selection criteria. The genotype data was further  
524 imputed with 1000 Genomes Project Phase 3 version 5 genotype ( $n = 2,504$ ) and Japanese  
525 whole-genome sequencing data ( $n = 1,037$ )<sup>36</sup> using Minimac3 software. After the imputation,  
526 we excluded variants with an imputation quality of  $Rsq < 0.7$  or those with a minor allele  
527 frequency (MAF)  $< 1\%$ .

528

529 *UK Biobank*

530 The UK Biobank project is a population-based prospective cohort that recruited  
531 approximately 500,000 people aged between 40–69 years from 2006 to 2010 from across

532 the United Kingdom (summary in **Supplementary Table 1b**; see **URLs**). Deep phenotype  
533 data, such as electronic medical records, lifestyle indicators and bioassays, and genotype  
534 data were available for most of the participants. The genotyping was performed using either  
535 the Applied Biosystems UK BiLEVE Axiom Array or the Applied Biosystems UK Biobank  
536 Axiom Array. The genotypes were further imputed using a combination of the Haplotype  
537 Reference Consortium, UK10K, and 1000 Genomes Phase 3 reference panels by IMPUTE4  
538 software. The detailed characteristics of the cohort were previously extensively described<sup>34</sup>.

539 In this project, we analyzed 361,194 individuals of white British genetic ancestry as  
540 determined by the PCA-based sample selection criteria (see **URLs**). We excluded the  
541 variants with (i) INFO score  $\leq 0.8$ , (ii) MAF  $\leq 0.0001$  (except for missense and protein-  
542 truncating variants annotated by VEP<sup>37</sup>, which were excluded if MAF  $\leq 1 \times 10^{-6}$ ), and (iii)  
543 HWE  $P \leq 1 \times 10^{-10}$ . All of the analyses were conducted via application 31063.

544

#### 545 *FinnGen*

546 FinnGen is a public-private partnership project combining genotype data from Finnish  
547 biobanks and digital health record data from Finnish health registries (see **URLs**). Six  
548 regional and three country-wide Finnish biobanks participate in FinnGen. Additionally, data  
549 from previously established population and disease-based cohorts are utilized. Participants'  
550 health outcomes are followed up by linking to the national health registries (1969–2016),  
551 which collect information from birth to death. We used the genotype and phenotype data of  
552 135,638 participants in this study, excluding population outliers via PCA (summary in  
553 **Supplementary Table 1c**). These individuals were genotyped with the FinnGen1  
554 ThermoFisher array and previous cohorts were genotyped with various genotyping arrays.

555 The genotype data was imputed using whole genome sequencing data from 3,775 Finnish  
556 individuals by beagle4.1 software (see **URLs**)<sup>38</sup>. After the imputation, we excluded variants  
557 with an imputation INFO score < 0.8 or MAF < 0.0001.

558

559

### 560 ***Survival analysis of clinical phenotypes***

561 We used Cox proportional hazard models to test the association of clinical phenotypes with  
562 lifespan (age at death) in BioBank Japan as described elsewhere<sup>39</sup>. In order to obtain and  
563 compare the HRs for the all-cause mortality across the traits, we scaled each trait to have  
564 zero mean and unit variance by Z-score transformation. The primary analyses included  
565 adjustment for sex, the 47-disease status and the top 20 principal components, which were  
566 supposed to account for possible confounders and population stratification. Additional  
567 summaries of clinical phenotypes and the number of samples without missing values are  
568 described in **Supplementary Table 3**. We next performed the same survival analyses in 20  
569 clinical phenotypes where individual-level phenotype data was available in UK Biobank  
570 (**Supplementary Table 7**). We used Cox proportional-hazard models to test the association  
571 of these clinical phenotypes with lifespan (age at death) with an adjustment for sex and the  
572 top 20 principal components as covariates.

573

574

### 575 ***Genome-wide association studies***

576 *BioBank Japan*



577 In order to derive population-specific PRSs of BioBank Japan, we first split the cohort into ten  
578 sub-groups. We then conducted GWASs for 45 quantitative traits within each of the ten sub-  
579 groups. We performed the linear regression assuming the additive effect of the imputed  
580 dosage of each variant by PLINK<sup>40</sup>. For individuals taking anti-hypertensive medications, we  
581 added 15 mmHg to their sBP and 10 mmHg to their dBP and derived their MAP and pulse  
582 pressure (PP) using the adjusted sBP and dBP. We also added smoking status as a covariate  
583 for blood pressure-related traits. Other trait-specific covariates, adjustment for medications,  
584 and sample exclusion criteria are described in **Supplementary Table 13** and elsewhere<sup>41</sup>.  
585 We next meta-analyzed the statistics from nine sub-groups by the inverse-variance method  
586 assuming the fixed-effect ten times, with keeping one sub-group away from the meta-analysis  
587 for PRS derivation and validation each time (a 10-fold leave-one-group-out [LOGO] meta-  
588 analysis approach). Before performing LOGO, we excluded genetically related individuals  
589 from the cohort, based on  $PI\_HAT > 0.125$ , as calculated by PLINK software. We note that  
590 we adopted this strategy to obtain precise estimates of the HR, not to maximize  $R^2$  value,  
591 which will be maximized when we have the largest GWAS samples. We applied LD Score  
592 Regression (LDSC)<sup>42</sup> to the meta-analyzed summary statistics to estimate the heritability and  
593 potential population stratification. We also performed cross-trait LDSC<sup>43</sup> to compare the  
594 statistics from the LOGO GWAS (meta-analysis of 9 subgroup GWASs) and those from the  
595 conventional GWAS (using all the individuals in the cohort). The summary results of the  
596 GWASs are described in **Supplementary Table 4**.

597

598 *UK Biobank*

599 We applied the ten-fold LOGO approach to 20 clinical phenotypes for which individual-level  
600 phenotype data in UK Biobank was available (**Supplementary Table 7**). We performed  
601 GWASs using the linear regression model in Hail v0.2 (see **URLs**) with covariates including  
602 age, age<sup>2</sup>, sex, and the top 20 principal components. For blood pressure traits, we added 15  
603 mmHg and 10 mmHg to sBP or dBP, respectively, if individuals are taking anti-hypertensive  
604 medication and derived the MAP and PP using the adjusted sBP and dBP. We also added  
605 smoking status as a covariate for blood pressure-related traits. We again performed cross-  
606 trait LDSC<sup>43</sup> to compare the statistics from the LOGO GWAS and those from the conventional  
607 GWAS, for which we used summary statistics from Dr. Benjamin Neale's lab (see **URLs**).  
608 The summary results of the meta-analyzed GWASs are described in **Supplementary Table**  
609 **8**. For the additional 13 traits among the remainder of the 25 traits investigated in BioBank  
610 Japan, we were able to collect independent large-scale GWAS summary statistics of  
611 European ancestry, either from publicly available websites or upon request to the authors.  
612 The information of these 13 GWASs is described in **Supplementary Table 6**.

613

#### 614 *FinnGen*

615 We did not perform within-cohort GWASs for the FinnGen cohort because the availability of  
616 individual-level phenotype data was limited. For the 20 traits where we performed LOGO in  
617 UK Biobank, we referred to UK Biobank GWAS summary statistics from all 361,194 white  
618 British individuals. With the exception of C-reactive protein (CRP), for 12 traits among the 13  
619 traits where we used independent GWAS summary statistics in UK Biobank, we utilized the  
620 same GWAS summary statistics, as we confirmed that there was no apparent cohort overlap  
621 with FinnGen (**Supplementary Table 6**). For CRP, since the GWAS of Ligthart et al. included

622 the FINRISK Study, which was also involved in FinnGen, we additionally performed GWAS  
623 in UK Biobank individuals ( $n = 353,466$ ). When performing CRP GWAS in UK Biobank, we  
624 excluded the individuals with autoimmune or inflammatory diseases.

625

626

## 627 ***Construction of Polygenic Risk Scores***

### 628 *BioBank Japan*

629 By referring to the effect sizes and  $P$  values of ten summary results from meta-analyzed  
630 GWASs of nine sub-group GWASs, we derived the PRSs of individuals in the one withheld  
631 sub-group using a clumping and thresholding method. First, we performed LD clumping on  
632 the meta-analyzed GWAS summary statistics with PLINK software using 5,000 randomly  
633 selected BioBank Japan participants as the LD reference. Briefly, we first used PLINK to  
634 clump all the variants using the following flags: --clump-p1 1 --clump-p2 1 --clump-r2 0.1 --  
635 clump-kb 1000. We then computed PRSs for variants meeting the following  $P$  value  
636 thresholds:  $5 \times 10^{-8}$ ,  $5 \times 10^{-7}$ ,  $1 \times 10^{-6}$ ,  $1 \times 10^{-4}$ ,  $1 \times 10^{-3}$ ,  $1 \times 10^{-2}$ ,  $5 \times 10^{-2}$ , 0.1, 0.2, 0.5, and 1. In the  
637 one withheld sub-group, we derived PRSs by multiplying the dosage of risk alleles for each  
638 variant by the effect size in the GWAS and summing the scores across all the selected  
639 variants. We quantified the trait variance explained by the derived PRSs in individuals within  
640 the withheld sub-group, by calculating the adjusted  $R^2$  attributable to the PRSs from nested  
641 models, in which the full linear model was the trait value  $\sim$  PRS + all covariates and the  
642 nested model dropped only the PRS term (**Supplementary Table 5**).

643

### 644 *UK Biobank and FinnGen*

645 For the clinical phenotypes for which the individual clinical data was available (20 traits in UK  
646 Biobank), we derived the PRSs in the same manner as described above for BioBank Japan  
647 (the ten-fold LOGO approach and deriving the PRSs in the one withheld group using the  
648 weights from the meta-analyzed summary statistics of nine sub-group GWASs by a clumping  
649 and thresholding approach). The variance explained by the derived PRSs is described in  
650 **Supplementary Table 10**. For the remaining 13 traits, we used a clumping and thresholding  
651 method on the collected large-scale GWAS summary statistics. Then, we derived the PRSs  
652 in the entire cohort referring to the weights and selected variants from the clumping and  
653 thresholding results. As noted above, we basically followed the original QC policy that had  
654 been adopted within each of the cohorts, and thus PRSs of UK Biobank and FinnGen could  
655 have included the rarer variants when compared with those of BioBank Japan ( $MAF > 0.0001$   
656 vs.  $MAF \geq 0.01$ ). We confirmed that both the performance of the PRSs and the result of  
657 downstream analyses did not substantially change, even when we restricted the variants  
658 used for calculating the PRSs to those with  $MAF \geq 0.01$  (i.e. the correlation  $r$  of these statistics  
659 exceeded 0.97) in UK Biobank and FinnGen.

660

661

## 662 ***Survival Analysis using PRSs***

### 663 *BioBank Japan*

664 We used Cox proportional-hazard models to test the association of the derived PRSs of  
665 clinical phenotypes with the length of lifespan (age at death) in the withheld sub-group. For  
666 the within-BioBank Japan analysis, we selected PRSs from the  $P$  value threshold of the best  
667 predictive capacity that had the largest variance explained by the PRS. We note that the

668 threshold selection was based on the predictive capacity of the trait under investigation and  
669 not based on the result of the association of PRSs with lifespan. For the trans-biobank  
670 analysis, since there were no individual-level data available for some of the traits, optimization  
671 of the  $P$  value thresholds for all the traits was technically challenging. We thus selected PRSs  
672 from the  $P$  value threshold of  $1.0 \times 10^{-6}$ , which was supposed to account for the polygenic  
673 architecture of complex traits while avoiding potential biases in PRS predictions induced by  
674 the large number of non-significant variants<sup>44</sup>. The PRSs for each trait in each sub-group  
675 were scaled to have zero mean and unit variance by Z-score transformation so as to obtain  
676 and compare the effect sizes across the investigated phenotypes. We used Cox proportional-  
677 hazard models to test the association of the scaled PRS of each trait in each sub-group with  
678 lifespan, with adjustment for sex, the 47-disease status and the top 20 principal components.  
679 We performed Schoenfeld residual tests<sup>45</sup> to examine the proportional hazards assumption  
680 for the Cox regression. No apparent correlation between the Schoenfeld residuals and time  
681 was statistically and visually confirmed. We further meta-analyzed the association statistics  
682 from each of the ten sub-groups by the inverse variance method. A sex-stratified association  
683 study (**Supplementary Figure 4a**) was conducted by using the same Cox proportional-  
684 hazard models within male and female participants, except that we excluded sex from  
685 covariates.

686 To describe a standardized survival curve, we compared HRs for participants at the  
687 highest genetic risk (fifth quintile of PRSs) with those at an intermediate risk (quintiles 2 to 4)  
688 or the lowest risk (first quintile) as described previously<sup>46</sup>, which were standardized to the  
689 mean of all the covariates (**Supplementary Figure 7**). For the PRS of systolic blood pressure  
690 (sBP), we also analyzed the interaction effects with lifestyle factors recorded in the cohort.

691 The lifestyle factors were obtained from the questionnaire to the participants, which asked  
692 them about their usual frequency of consumption or exercise of an investigated trait by  
693 selecting one from four categorical values. The answered values were converted to the  
694 quantitative values so that they represented the mean value of each category, except for the  
695 two binary lifestyle traits (whether the participant has ever smoked cigarettes and whether  
696 the participant currently drinks alcohol) (**Supplementary Table 12**). All the survival analyses  
697 were performed using the survival package in R software, version 3.3.0 (see **URLs**).

698

#### 699 *UK Biobank and FinnGen*

700 For the quantitative traits where the individual level-data was available (20 traits in UK  
701 Biobank), we performed the same 10-fold survival analyses followed by meta-analysis as  
702 explained above in BioBank Japan. For the remaining traits, we performed the survival  
703 analyses on the entire cohort to test the association of the public GWAS-based PRS of each  
704 trait with lifespan. As described above, we adopted the  $P$  value threshold of  $1 \times 10^{-6}$  for the  
705 derivation of PRSs for the cross-biobank comparison. We included the same covariates used  
706 in the GWASs for each cohort, except for age and age<sup>2</sup>, in the Cox proportional hazard  
707 models. A sex-stratified association study (**Supplementary Figure 4b and c**) was conducted  
708 by using the same Cox proportional-hazard models within male and female participants,  
709 except that we excluded sex from the covariates.

710 As a secondary analysis, we performed a replication study of the association of sBP PRS  
711 on lifespan by using parental lifespan data in UK Biobank to validate the result of primary  
712 analysis with larger statistical power. To perform an association test of individuals' genotype  
713 with their father's and mother's survival, we separately calculated Martingale residuals of

714 the Cox model under a null model, scaled up to give a residual trait with a 1:1 correspondence  
715 with the HR, and tested its association with genotype dosage as described previously<sup>47</sup>.

716 For the PRS of BMI, we also analyzed the interaction effects with lifestyle factors  
717 recorded in UK Biobank. We collected the individual-level data of smoking status (ever  
718 smoked and smoking cessation), alcohol intake, coffee intake, and regular physical activity,  
719 and tested the effect of the interaction term between the BMI PRS and each of the lifestyle  
720 factors on lifespan.

721 We finally performed a fixed-effect meta-analysis of the PRS-lifespan association studies  
722 from BioBank Japan, UK Biobank, and FinnGen, by inverse variance method. To estimate  
723 the years of life gained or lost from PRS-lifespan associations, we converted the effect size  
724 from the Cox proportional hazard models into the years gained based on the following  
725 equation as described previously<sup>39,47</sup>;

$$726 \quad \text{Years gained} = 10 \times \{-\log_e(\text{cox hazard ratio})\}$$

727 The association results of the trans-ethnic PRS meta-analysis including the years of life  
728 gained/lost are described them in **Supplementary Table 9**.

729

730

### 731 ***Trans-ethnic Mendelian Randomization study***

732 We conducted two-sample Mendelian randomization (MR) study to see the effect of each of  
733 33 biomarkers on the outcome (i.e. lifespan) across three cohorts.

734 For the traits where we performed LOGO in PRS calculation (i.e. 33 traits in BioBank  
735 Japan and 20 traits in UK Biobank), we randomly split the cohort into half, and assigned them  
736 to the GWAS group (discovery) and the MR group (validation). For the selection of variants

737 to be used as instrumental variables, we performed GWASs within the GWAS group for these  
738 traits with the same covariates described earlier, and selected independent genetic variants  
739 with  $P_{\text{GWAS}} < 1.0 \times 10^{-6}$  for each trait (lead variants at significant loci at least  $\pm 500$  kb distant  
740 from each other). We next performed association study of these genetic variants with lifespan  
741 within the MR group, by using the same Cox proportional-hazard model described earlier. By  
742 using these genetic variants and association estimates, we obtained the effect estimate of  
743 the exposure (biomarker) on the outcome (lifespan) by pooling all MR estimates using the  
744 fixed-effects inverse-variance weighted method<sup>48</sup>.

745 For the traits where we used independent GWAS summary statistics in PRS calculation  
746 (i.e. 13 traits in UK Biobank and 33 traits in FinnGen), we selected independent genetic  
747 variants with  $P_{\text{GWAS}} < 1.0 \times 10^{-6}$  from these statistics. We next performed association study of  
748 these genetic variants with lifespan in a whole cohort, by using the same Cox proportional-  
749 hazard model. These estimates are used to obtain the MR effect estimate by inverse-variance  
750 weighted method.

751 We finally performed the fixed-effect meta-analysis of these effect estimate in MR from  
752 each of the three cohorts.

753

754



755 **References**

- 756 1. Torkamani, A., Wineinger, N. E. & Topol, E. J. The personal and clinical utility of  
757 polygenic risk scores. *Nat. Rev. Genet.* **19**, 1–10 (2018).
- 758 2. Khera, A. V. *et al.* Genome-wide polygenic scores for common diseases identify  
759 individuals with risk equivalent to monogenic mutations. *Nat. Genet.* **50**, 1219–1224  
760 (2018).
- 761 3. Mahajan, A. *et al.* Fine-mapping type 2 diabetes loci to single-variant resolution using  
762 high-density imputation and islet-specific epigenome maps. *Nat. Genet.* **50**, 1505–  
763 1513 (2018).
- 764 4. Schumacher, F. R. *et al.* Association analyses of more than 140,000 men identify 63  
765 new prostate cancer susceptibility loci. *Nat. Genet.* **50**, 928–936 (2018).
- 766 5. Martin, A. R. *et al.* Clinical use of current polygenic risk scores may exacerbate health  
767 disparities. *Nat. Genet.* **51**, 584–591 (2019).
- 768 6. Duncan, L. *et al.* Analysis of polygenic risk score usage and performance in diverse  
769 human populations. *Nat. Commun.* **10**, 3328 (2019).
- 770 7. Thun, M. J. *et al.* 50-Year Trends in Smoking-Related Mortality in the United States.  
771 *N. Engl. J. Med.* **368**, 351–364 (2013).
- 772 8. Sotos-Prieto, M. *et al.* Association of Changes in Diet Quality with Total and Cause-  
773 Specific Mortality. *N. Engl. J. Med.* **377**, 143–153 (2017).
- 774 9. Stolberg, H. O., Norman, G. & Trop, I. Randomized Controlled Trials. *Am. J.*  
775 *Roentgenol.* **183**, 1539–1544 (2004).
- 776 10. Nagai, A. *et al.* Overview of the BioBank Japan Project: Study design and profile. *J.*  
777 *Epidemiol.* **27**, S2–S8 (2017).

- 778 11. Hirata, M. *et al.* Overview of BioBank Japan follow-up data in 32 diseases. *J.*  
779 *Epidemiol.* **27**, S22–S28 (2017).
- 780 12. Hirata, M. *et al.* Cross-sectional analysis of BioBank Japan clinical data: A large  
781 cohort of 200,000 patients with 47 common diseases. *J. Epidemiol.* **27**, S9–S21  
782 (2017).
- 783 13. Fischer, K. *et al.* Biomarker Profiling by Nuclear Magnetic Resonance Spectroscopy  
784 for the Prediction of All-Cause Mortality: An Observational Study of 17,345 Persons.  
785 *PLoS Med.* **11**, e1001606 (2014).
- 786 14. Kunutsor, S. K., Apekey, T. A., Seddoh, D. & Walley, J. Liver enzymes and risk of all-  
787 cause mortality in general populations: A systematic review and meta-analysis. *Int. J.*  
788 *Epidemiol.* **43**, 187–201 (2014).
- 789 15. Emerging Risk Factors Collaboration, D. *et al.* Adult height and the risk of cause-  
790 specific death and vascular morbidity in 1 million people: individual participant meta-  
791 analysis. *Int. J. Epidemiol.* **41**, 1419–33 (2012).
- 792 16. Ihira, H. *et al.* Adult height and all-cause and cause-specific mortality in the Japan  
793 Public Health Center-based Prospective Study (JPHC). *PLoS One* **13**, e0197164  
794 (2018).
- 795 17. Davey Smith, G. & Hemani, G. Mendelian randomization: genetic anchors for causal  
796 inference in epidemiological studies. *Hum. Mol. Genet.* **23**, R89-98 (2014).
- 797 18. Burgess, S. & Thompson, S. G. Use of allele scores as instrumental variables for  
798 Mendelian randomization. *Int. J. Epidemiol.* **42**, 1134–1144 (2013).
- 799 19. Martin, A. R. *et al.* Human Demographic History Impacts Genetic Risk Prediction  
800 across Diverse Populations. *Am. J. Hum. Genet.* **100**, 635–649 (2017).

- 801 20. Dorresteyjn, J. A. N. *et al.* Relation between blood pressure and vascular events and  
802 mortality in patients with manifest vascular disease: J-curve revisited. *Hypertension*  
803 **59**, 14–21 (2012).
- 804 21. Rawshani, A. *et al.* Risk Factors, Mortality, and Cardiovascular Outcomes in Patients  
805 with Type 2 Diabetes. *N. Engl. J. Med.* **379**, 633–644 (2018).
- 806 22. He, J. *et al.* Premature deaths attributable to blood pressure in China: a prospective  
807 cohort study. *Lancet* **374**, 1765–1772 (2009).
- 808 23. Lewington, S., Clarke, R., Qizilbash, N., Peto, R. & Collins, R. Age-specific relevance  
809 of usual blood pressure to vascular mortality: A meta-analysis of individual data for  
810 one million adults in 61 prospective studies. *Lancet* **360**, 1903–1913 (2002).
- 811 24. Chen, G., McAlister, F. A., Walker, R. L., Hemmelgarn, B. R. & Campbell, N. R. C.  
812 Cardiovascular outcomes in framingham participants with diabetes: the importance of  
813 blood pressure. *Hypertens. (Dallas, Tex. 1979)* **57**, 891–7 (2011).
- 814 25. Erikson, G. A. *et al.* Whole-Genome Sequencing of a Healthy Aging Cohort. *Cell* **165**,  
815 1002–1011 (2016).
- 816 26. Zheng, W. *et al.* Association between body-mass index and risk of death in more than  
817 1 million Asians. *N. Engl. J. Med.* **364**, 719–29 (2011).
- 818 27. Ravnskov, U. *et al.* Lack of an association or an inverse association between low-  
819 density-lipoprotein cholesterol and mortality in the elderly: A systematic review. *BMJ*  
820 *Open* **6**, (2016).
- 821 28. Bonaccio, M. *et al.* Age-sex-specific ranges of platelet count and all-cause mortality:  
822 prospective findings from the MOLI-SANI study. *Blood* **127**, 1614–6 (2016).

- 823 29. Ueshima, H. *et al.* Impact of elevated blood pressure on mortality from all causes,  
824 cardiovascular diseases, heart disease and stroke among Japanese: 14 year follow-  
825 up of randomly selected population from Japanese - Nippon data 80. *J. Hum.*  
826 *Hypertens.* **17**, 851–857 (2003).
- 827 30. Gerds, E. *et al.* Left ventricular hypertrophy offsets the sex difference in  
828 cardiovascular risk (the Campania Salute Network). *Int. J. Cardiol.* **258**, 257–261  
829 (2018).
- 830 31. Smith, G. D. & Hemani, G. Mendelian randomization: Genetic anchors for causal  
831 inference in epidemiological studies. *Hum. Mol. Genet.* **23**, 89–98 (2014).
- 832 32. Richardson, T. G., Harrison, S., Hemani, G. & Davey Smith, G. An atlas of polygenic  
833 risk score associations to highlight putative causal relationships across the human  
834 phenome. *Elife* **8**, (2019).
- 835 33. Frieser, M. J., Wilson, S. & Vrieze, S. Behavioral impact of return of genetic test  
836 results for complex disease: Systematic review and meta-analysis. *Health Psychol.*  
837 **37**, 1134–1144 (2018).
- 838 34. Bycroft, C. *et al.* The UK Biobank resource with deep phenotyping and genomic data.  
839 *Nature* **562**, 203–209 (2018).
- 840 35. Robinson, M. R. *et al.* Genetic evidence of assortative mating in humans. *Nat. Hum.*  
841 *Behav.* **1**, 0016 (2017).
- 842 36. Akiyama, M. *et al.* Characterizing rare and low-frequency height-associated variants  
843 in the Japanese population. *Nat. Commun.* **10**, 4393 (2019).
- 844 37. McLaren, W. *et al.* The Ensembl Variant Effect Predictor. *Genome Biol.* **17**, 122  
845 (2016).

- 846 38. Browning, B. L. & Browning, S. R. Genotype Imputation with Millions of Reference  
847 Samples. *Am. J. Hum. Genet.* **98**, 116–126 (2016).
- 848 39. Timmers, P. R. *et al.* Genomics of 1 million parent lifespans implicates novel  
849 pathways and common diseases and distinguishes survival chances. *Elife* **8**, (2019).
- 850 40. Purcell, S. *et al.* PLINK: A Tool Set for Whole-Genome Association and Population-  
851 Based Linkage Analyses. *Am. J. Hum. Genet.* **81**, 559–575 (2007).
- 852 41. Kanai, M. *et al.* Genetic analysis of quantitative traits in the Japanese population links  
853 cell types to complex human diseases. *Nat. Genet.* **50**, 390–400 (2018).
- 854 42. Bulik-Sullivan, B. *et al.* LD score regression distinguishes confounding from  
855 polygenicity in genome-wide association studies. *Nat. Genet.* **47**, 291–295 (2015).
- 856 43. Bulik-Sullivan, B. *et al.* An atlas of genetic correlations across human diseases and  
857 traits. *Nat. Genet.* **47**, 1236–1241 (2015).
- 858 44. Sohail, M. *et al.* Polygenic adaptation on height is overestimated due to uncorrected  
859 stratification in genome-wide association studies. *Elife* **8**, (2019).
- 860 45. GRAMBSCH, P. M. & THERNEAU, T. M. Proportional hazards tests and diagnostics  
861 based on weighted residuals. *Biometrika* **81**, 515–526 (1994).
- 862 46. Mega, J. L. *et al.* Genetic risk, coronary heart disease events, and the clinical benefit  
863 of statin therapy: An analysis of primary and secondary prevention trials. *Lancet* **385**,  
864 2264–2271 (2015).
- 865 47. Joshi, P. K. *et al.* Genome-wide meta-analysis associates HLA-DQA1/DRB1 and LPA  
866 and lifestyle factors with human longevity. *Nat. Commun.* **8**, 910 (2017).

- 867 48. Burgess, S., Butterworth, A. & Thompson, S. G. Mendelian randomization analysis  
868 with multiple genetic variants using summarized data. *Genet. Epidemiol.* **37**, 658–665  
869 (2013).

870

871

872 **URLs**

- 873 - Mean body mass index trends among adults estimates by country from Global Health  
874 Observatory data repository by WHO;  
875 <http://apps.who.int/gho/data/view.main.BMIMEANADULTCv?lang=en>
- 876 - UK Biobank; <http://www.ukbiobank.ac.uk>
- 877 - FinnGen; <https://www.finngen.fi>
- 878 - Source code for selecting individuals of white British ancestry;  
879 [https://github.com/Nealelab/UK\\_Biobank\\_GWAS/blob/master/ukb31063\\_eur\\_selection](https://github.com/Nealelab/UK_Biobank_GWAS/blob/master/ukb31063_eur_selection).
- 880 **R**
- 881 - Beagle4.1: [https://faculty.washington.edu/browning/beagle/b4\\_1.html](https://faculty.washington.edu/browning/beagle/b4_1.html)
- 882 - Hail software; <https://hail.is>
- 883 - Survival package in R software; <https://cran.r-project.org/package=survival>
- 884 - UK Biobank GWAS results from Dr. Benjamin Neale's lab; <http://www.nealelab.is/uk->  
885 biobank
